# Supplementary material for: Significantly improved photovoltaic performance of the triangular-spiral TPA(DPP–PN)3 by appending planar phenanthrene units into the molecular terminals
Source: Royal Society of Chemistry journal article supplement (doi:10.1039/c4ta03688c), 2014-09-05
Supplement: c4ta03688c1.pdf [file c4ta03688c1.pdf]

# **Supporting information for**

## **Significantly improved photovoltaic performance of the triangular-spiral TPA(DPP-PN)<sub>3</sub> by appending planar phenanthrene units into the molecular terminals**

Youming Zhang,<sup>a</sup> Xichang Bao,<sup>\*b</sup> Manjun Xiao,<sup>a,b</sup> Hua Tan,<sup>\*a,c</sup> Qiang Tao,<sup>a</sup> Yafei

Wang,<sup>a</sup> Yu Liu,<sup>a</sup> Renqiang Yang<sup>\*b</sup> and Weiguo Zhu<sup>\*a</sup>

*<sup>a</sup>College of Chemistry, Xiangtan University, Key Lab of Environment-Friendly  
Chemistry and Application in Ministry of Education, Xiangtan 411105, China*

*<sup>b</sup>Qingdao Institute of Bioenergy and Bioprocess Technology, Chinese Academy of  
Sciences, Qingdao, Shandong 266101, China*

*<sup>c</sup> Institute of Polymer Optoelectronic Materials and Devices, State Key Laboratory of  
Luminescent Materials and Devices, South China University of Technology,  
Guangzhou 510640, China*

\* Corresponding authors. Tel.: +86-731-58293377; fax: +86-731-58292251(W. Zhu).

Email addresses:

(W. Z.) zhuwg18@126.com,

(R. Y.) yangrq@qibebt.ac.cn,

(X. B.) baoxc@qibebt.ac.cn,

(H. T) tanhua815@126.com.

## 1. General considerations for characterization

**Instrument:** Nuclear magnetic resonance (NMR) spectra were recorded on a Bruker DRX 400 spectrometer using tetramethylsilane as a reference in deuterated chloroform solution at 298 K. MALDI-TOF mass spectrometric measurements were performed on Bruker Biflex III MALDI-TOF. Thermogravimetric analysis (TGA) was conducted under a dry nitrogen gas flow at a heating rate of 10 °C min<sup>-1</sup> on a Perkin- Elmer TGA 7. UV-Vis absorption spectra were recorded on a HP-8453 UV visible system. Cyclic voltammetry was carried out on a CHI660A electrochemical work station in a three-electrode cell dipped in a 0.1M tetrabutylammonium hexafluoro- phosphate (Bu<sub>4</sub>NPF<sub>6</sub>) acetonitrile solution under nitrogen protection at a scan rate of 100 mV/s and room temperature (RT). In this three-electrode cell, a platinum rod, platinum wire and Ag/AgCl electrode were used as a working electrode, counter electrode and reference electrode, respectively.

**Device fabrication and characterization:** OSCs were fabricated using indium tin oxide (ITO) glass as an anode, Ca(10 nm)/Al(100 nm) as a cathode, and a blend film of the small molecules and [6,6]-phenyl-C61 (or C71)-butyric acid methyl ester (PCBM) as a photosensitive layer. After a 30 nm buffer layer of poly- (3,4-ethylene-dioxythiophene) and polystyrene sulfonic acid (PEDOT: PSS) was spin-coated onto the precleaned ITO glass, the photosensitive layer was subsequently prepared by spin-coating a solution of the polymer and PCBM (1:2.5, w/w) in chloroform on the PEDOT:PSS layer with a typical concentration of 10 mg mL<sup>-1</sup>, followed by annealing at 50 °C for 10 minutes to remove chloroform. Ca (10 nm) and Al (100 nm) were successively deposited on the photosensitive layer in vacuum and used as top

electrodes. The current density-voltage ( $J$ - $V$ ) characteristics were recorded with a Keithley 2420 source measurement unit under simulated 100 mW cm<sup>-2</sup> (AM 1.5G) irradiation from a Newport solar simulator. Light intensity was calibrated with a standard silicon solar cell. The external quantum efficiencies ( $EQE$ ) of solar cells were analyzed using a certified Newport incident photon conversion efficiency ( $IPCE$ ) measurement system.

Hole mobility of the molecules (1:2.5,  $w/w$ ) blend film was measured according to a similar method described in the literature<sup>[1-2]</sup>, using a diode configuration of ITO/PEDOT:PSS(40nm)/active layer (180 or 230 nm)/Ca(10 nm)/Al(100 nm) MoO<sub>3</sub> (5 nm)/Ag (80 nm) by taking current-voltage current in the range of 0 - 4 V and fitting the results to a space charge limited form, where the space charge limited current (SCLC) is described by  $J = 9\epsilon_0\epsilon_r\mu_h V^2/8L^3$ , where  $J$  is the current density,  $L$  is the film thickness of active layer,  $\mu_h$  is the hole mobility,  $\epsilon_r$  is the relative dielectric constant of the transport medium,  $\epsilon_0$  is the permittivity of free space ( $8.85 \times 10^{-12}$  F m<sup>-1</sup>),  $V$  is the internal voltage in the device and  $V = V_{\text{appl}} - V_a - V_{\text{bi}}$ , where  $V_{\text{appl}}$  is the applied voltage to the device,  $V_a$  is the voltage drop due to contact resistance and series resistance across the electrodes, and  $V_{\text{bi}}$  is the built-in voltage due to the relative work function difference of the two electrodes.

## 2. Photovoltaic Properties of the TPA(DPP-PN)<sub>3</sub> based OSCs at different conditions

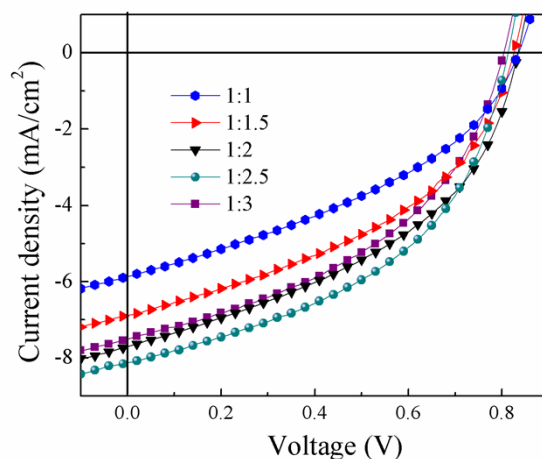

**Figure S1.** Current–voltage ( $J$ – $V$ ) curves of BHJ solar cells with the TPA(DPP-PN)<sub>3</sub>/PC<sub>61</sub>BM blends at various weight ratios under AM 1.5G illumination (100 mW cm<sup>−2</sup>).

**Table S1.** Photovoltaic properties of BHJ solar cell devices with a configuration of ITO/PEDOT: PSS/ TPA(DPP-PN)<sub>3</sub>:PC<sub>61</sub>BM/Ca/Al<sup>a</sup>

| TPA(DPP-P) <sub>3</sub> :PC <sub>61</sub> BM | $V_{oc}$ / V | $J_{sc}$ / mA cm <sup>−2</sup> | $FF$ / % | $PCE_{max}$ / % |
|----------------------------------------------|--------------|--------------------------------|----------|-----------------|
| 1:1                                          | 0.83         | 5.86                           | 38.99    | 1.90            |
| 1:1.5                                        | 0.82         | 6.88                           | 43.21    | 2.45            |
| 1:2                                          | 0.83         | 7.69                           | 43.90    | 2.82            |
| 1:2.5                                        | 0.81         | 8.12                           | 46.62    | 3.07            |
| 1:3                                          | 0.80         | 7.50                           | 44.21    | 2.66            |

<sup>a</sup> Measured under AM 1.5 G irradiation (100 mW cm<sup>−2</sup>).

### 3. Film morphology

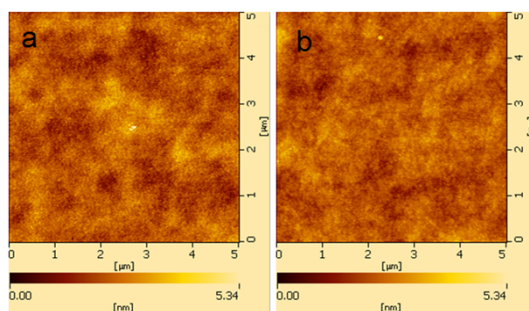

**Figure S2.** Tapping-mode AFM images of the blended films of TPA-3DPP/PC<sub>71</sub>BM (a) and TPA(DPP-PN)<sub>3</sub>/PC<sub>71</sub>BM (b) on glass/ITO/PEDOT:PSS substrate.

### 4. <sup>1</sup>H NMR and MS profiles of PN-BPin, PN-DPP, PN-DPP-Br, TPA-3BPin, TAP-3DPP and TPA(DPP-PN)<sub>3</sub>.

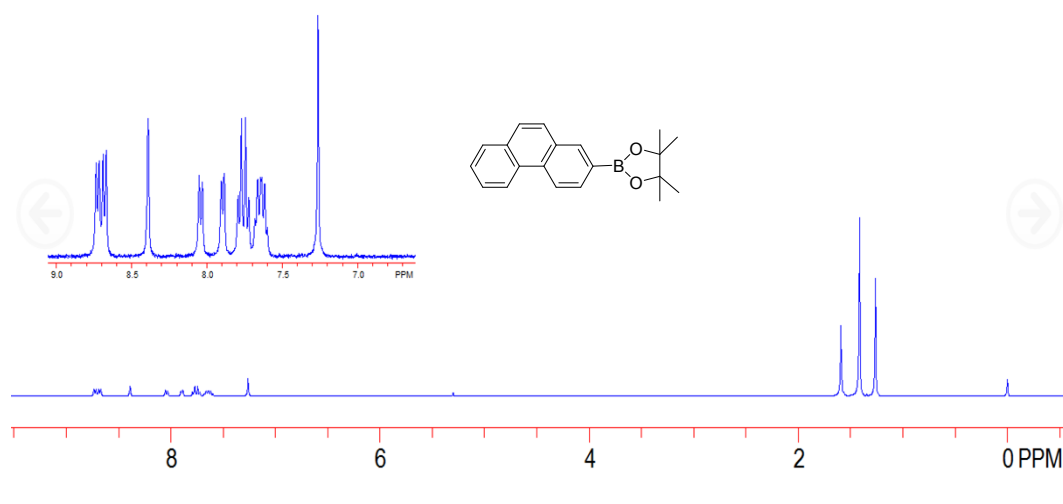

**Figure S3-1.** <sup>1</sup>H NMR profile of PN-BPin

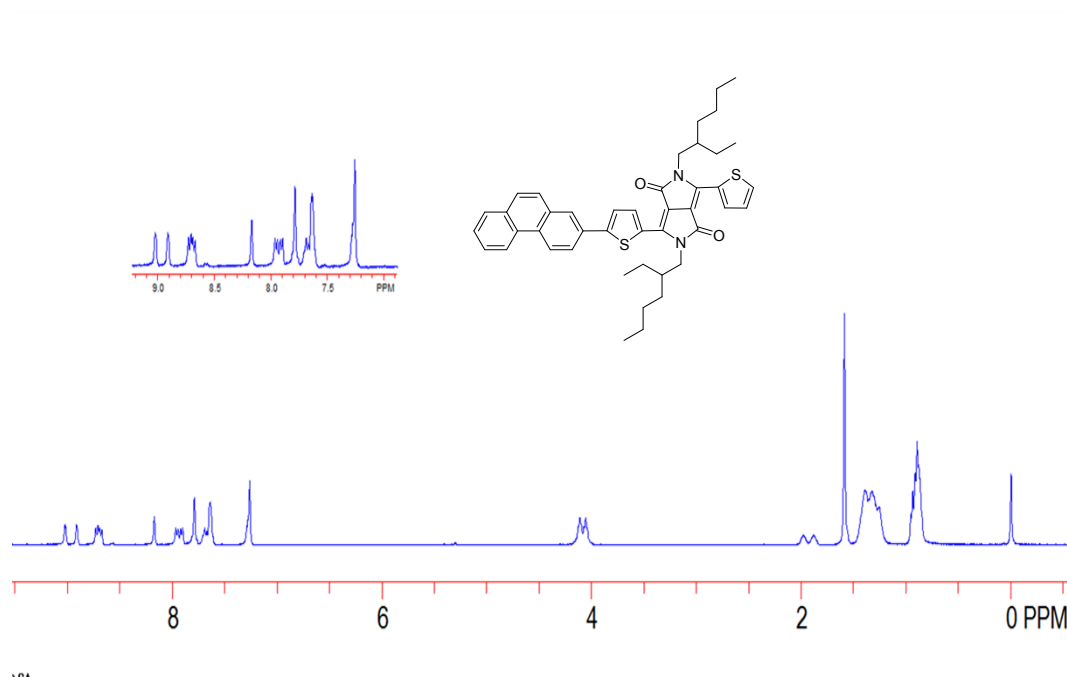

**Figure S3-2.** <sup>1</sup>H NMR profile of PN-DPP

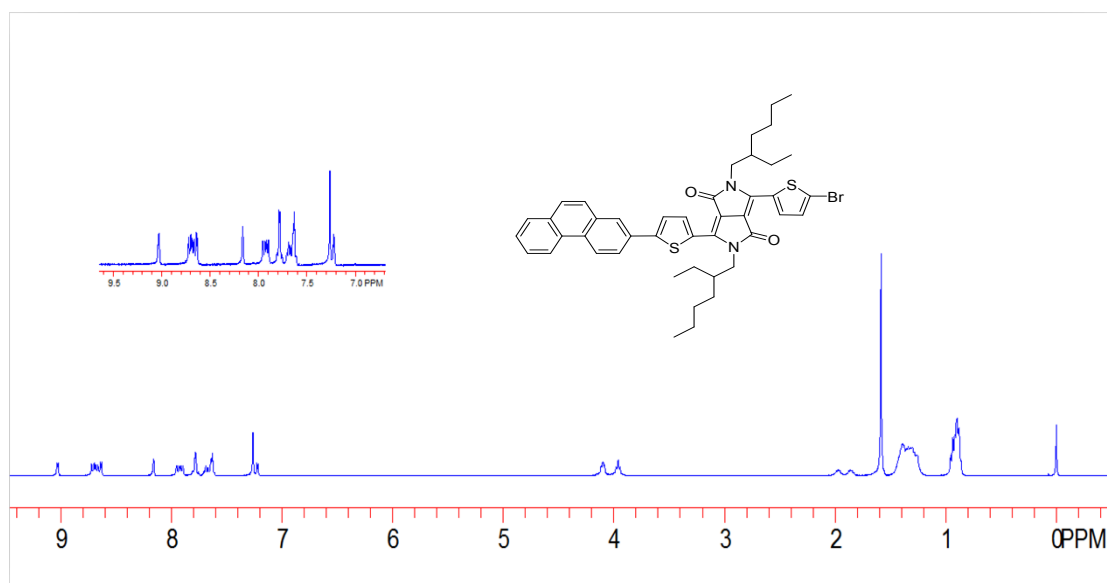

**Figure S3-3.** <sup>1</sup>H NMR profile of PN-DPP-Br



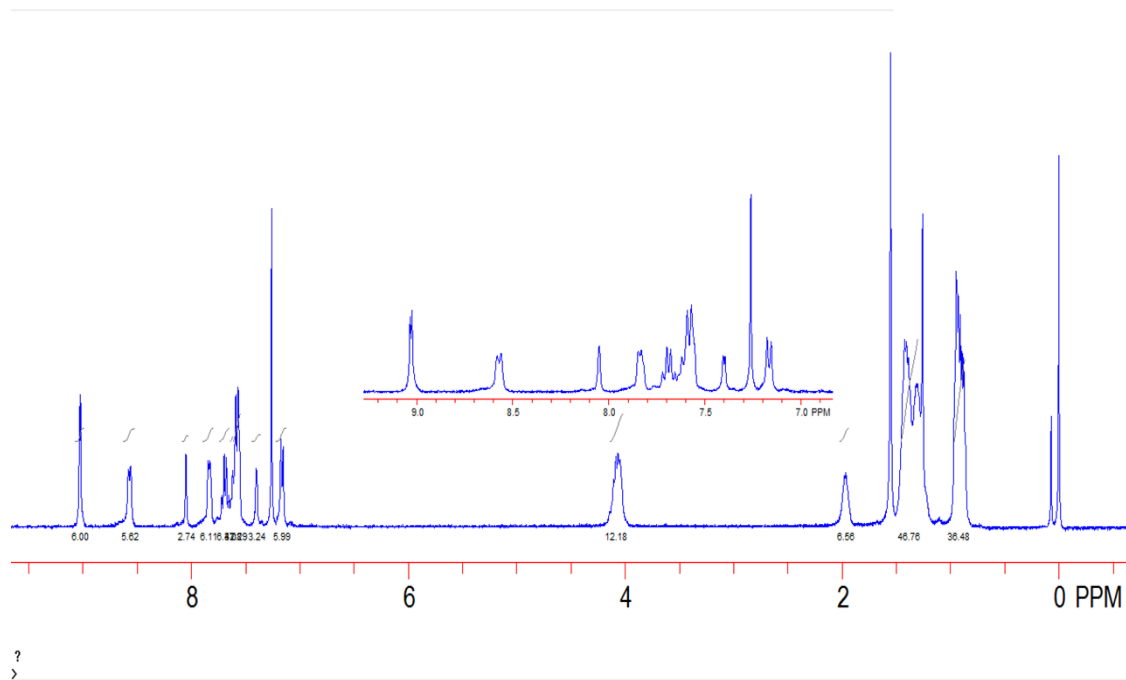

**Figure S3-6.**  $^1\text{H}$  NMR profile of  $\text{TPA}(\text{DPP-PN})_3$

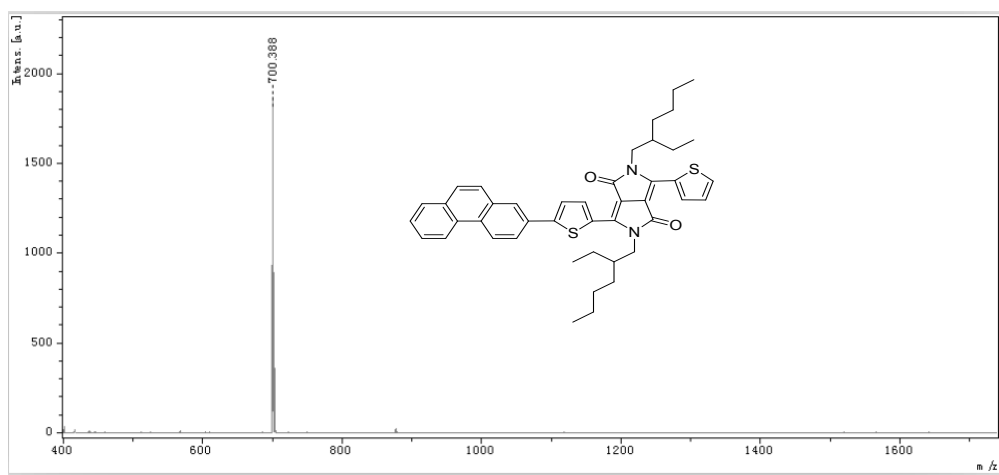

**Figure S3-7.** MS profile of  $\text{PN-DPP}$

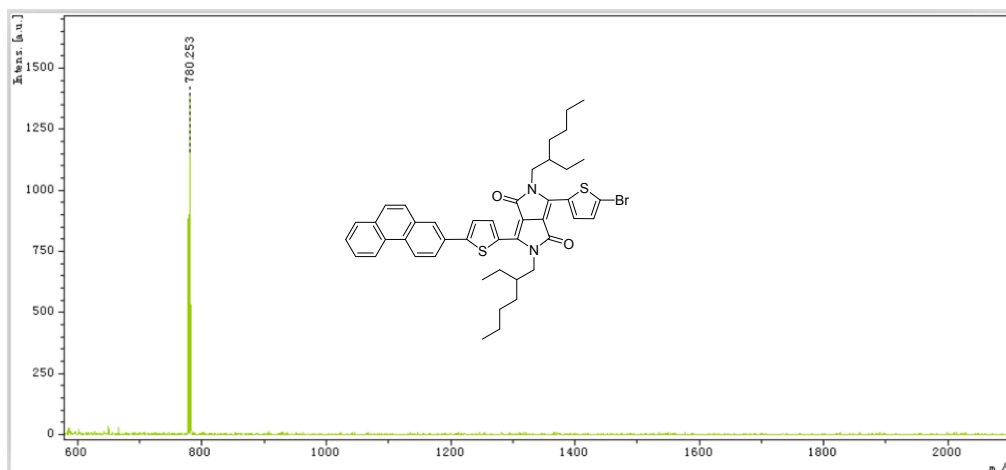

**Figure S3-8.** MS profile of PN-DPP-Br

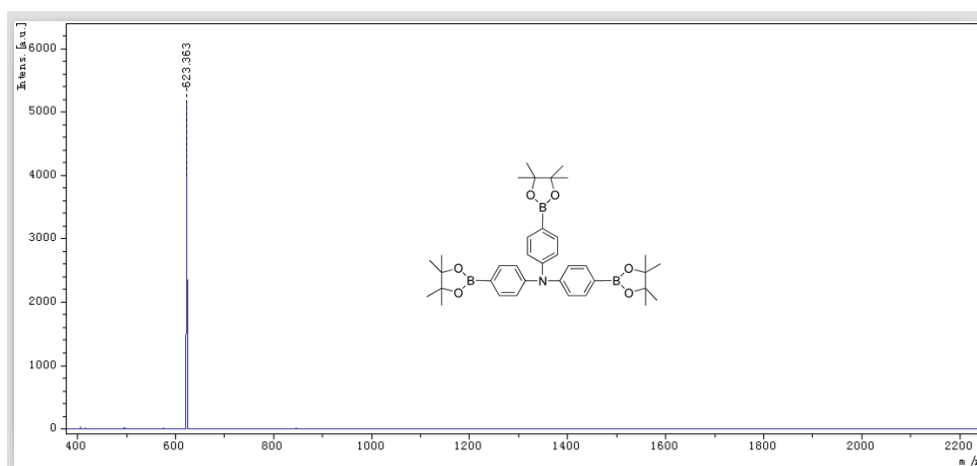

**Figure S3-9.** MS profile of TPA-3BPIn

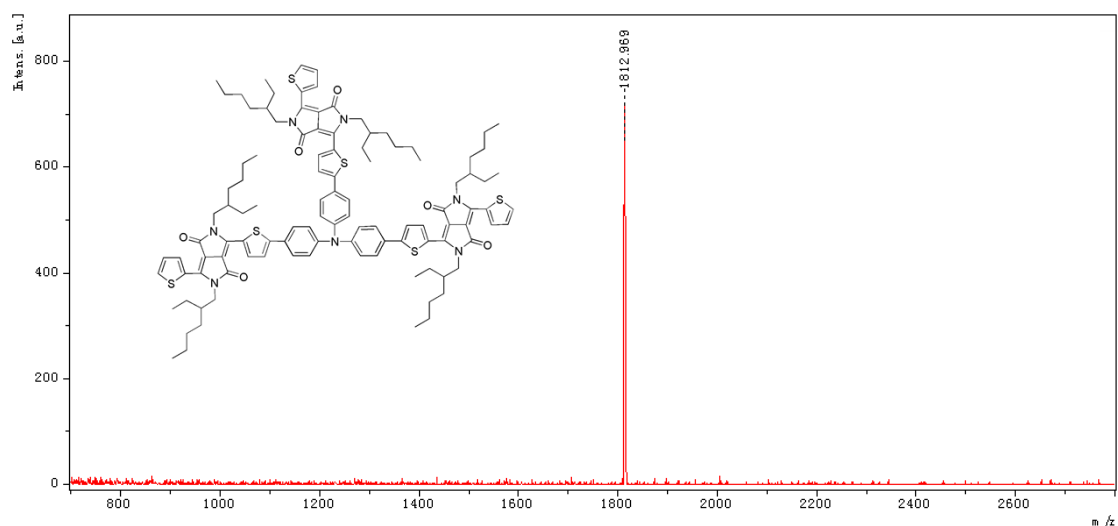

**Figure S3-10.** MS profile of TPA-3DPP

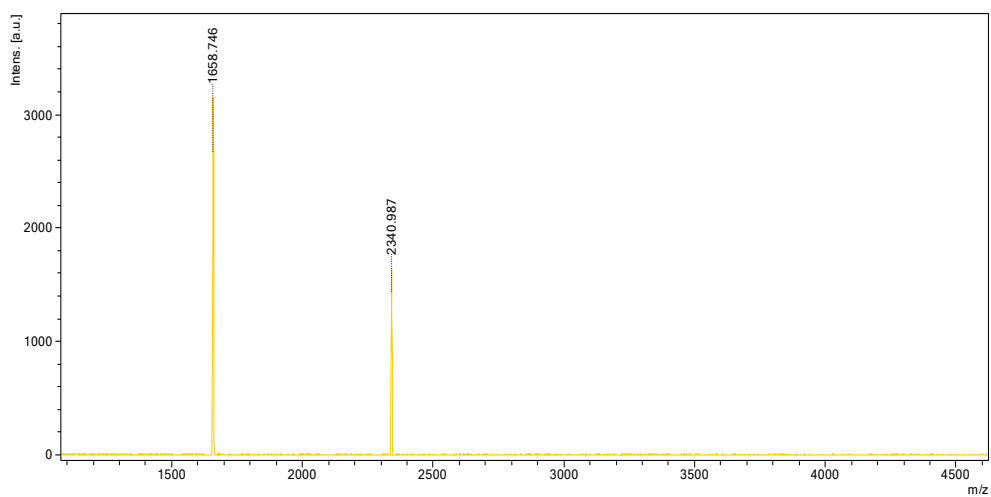

**Figure S3-11.** MS profile of TPA(DPP-PN)<sub>3</sub>

## Reference

- [1]. M. Wang, X.W. Hu, P. Liu, W. Li, X. Gong, F. Huang, Y. Cao, *J. Am. Chem. Soc.* 2011, **133**, 9638.
- [2]. Z.C. He, C.M. Zhong, X. Huang, W.Y. Wong, H.B. Wu, L.X. Chen, Y. Cao, *Adv. Mater.* 2011, **23**, 4636.
